# Supplementary material
Source: PubMed Central journal article supplement (PMC2998092)

**Characterization of FdmV as an amide synthetase for fredericamycin A biosynthesis in  
*Streptomyces griseus* ATCC 43944**

**Yihua Chen<sup>†</sup>, Evelyn Wendt-Pienkowski<sup>†</sup>, Jianhua Ju<sup>†</sup>, Shuangjun Lin<sup>†</sup>, Scott R. Rajski<sup>†</sup>,  
and Ben Shen<sup>\*,†,#,‡</sup>**

From the <sup>†</sup>Division of Pharmaceutical Sciences, <sup>#</sup>University of Wisconsin National Cooperative Drug  
Discovery Group, and <sup>‡</sup>Department of Chemistry, University of Wisconsin-Madison, Madison,  
Wisconsin, 53705-2222, USA

Running title: FdmV as an amide synthetase

Address correspondence to: Ben Shen, Division of Pharmaceutical Sciences, School of Pharmacy,  
University of Wisconsin-Madison, 777 Highland Ave., Madison, WI 53705-2222,  
Tel: (608) 263-2673; Fax: (608) 262-5245; Email: [bshen@pharmacy.wisc.edu](mailto:bshen@pharmacy.wisc.edu)

**SUPPLEMENTAL DATA**

|                                                                                                 |    |
|-------------------------------------------------------------------------------------------------|----|
| Table S1. <sup>1</sup> H NMR and gCOSY data of FDM C in <i>d</i> <sub>6</sub> -DMSO             | S2 |
| Figure S1. Construction and confirmation of the <i>ΔfdmV</i> mutant strain SB4027               | S3 |
| Figure S2. Amino acid sequence comparison of FdmV with selected homologs and AS B               | S4 |
| Figure S3. Optimization of FdmV assay conditions with varying pH and DMSO concentration         | S5 |
| Figure S4. Structures of benzoic acids tested as substrate analogs for FdmV-catalyzed amidation | S5 |
| Figure S5. FdmV-catalyzed amidation of FDM M-3 to FDM M-6 as analyzed by HPLC                   | S5 |

TABLE S1. <sup>1</sup>H NMR and gCOSY data of FDM C in *d*<sub>6</sub>-DMSO.

| Position             | FDM C in <i>d</i> <sub>6</sub> -DMSO (500 Hz) |            |
|----------------------|-----------------------------------------------|------------|
|                      | $\delta_{\text{H}}$ (J (Hz))                  | gCOSY(H→H) |
| 1                    |                                               |            |
| 2                    |                                               |            |
| 3                    |                                               |            |
| 4                    |                                               |            |
| 5                    |                                               |            |
| 6                    |                                               |            |
| 7                    |                                               |            |
| 8                    |                                               |            |
| 9                    |                                               |            |
| 10                   |                                               |            |
| 11                   |                                               |            |
| OCH <sub>3</sub> -11 | 3.94 (3H, s)                                  |            |
| 12                   | 6.93 (1H, s)                                  |            |
| 13                   |                                               |            |
| 14                   |                                               |            |
| 15                   |                                               |            |
| 16                   |                                               |            |
| 17                   |                                               |            |
| 18                   |                                               |            |
| 19                   | 2.80 (2H, br)                                 | 20         |
| 20                   | 2.69 (2H, br)                                 | 19         |
| 21                   |                                               |            |
| 22                   | 6.75 (1H, s)                                  |            |
| 23                   |                                               |            |
| 24                   | 4.25 (2H, s)                                  |            |
| 25                   |                                               |            |
| 26                   | 6.17 (1H, d, 15.5)                            | 27         |
| 27                   | 7.24 (1H, dd, 15.5, 9.0)                      | 26, 28     |
| 28                   | 6.31 (1H, m)                                  | 27         |
| 29                   | 6.32 (1H, m)                                  | 30         |
| 30                   | 1.85 (3H, d, 4.5)                             | 29         |
| COOH-1               | - <sup>a</sup>                                |            |
| OH-3                 | 12.69 (1H, s) <sup>b</sup>                    |            |
| OH-6                 | 12.85 (1H, s) <sup>b</sup>                    |            |
| OH-10                | - <sup>b</sup>                                |            |
| OH-13                | - <sup>b</sup>                                |            |
| OH-17                | - <sup>b</sup>                                |            |

<sup>a</sup> not observed

<sup>b</sup> interchangeable.

FIGURE S1. Construction and confirmation of the  $\Delta fdmV$  mutant strain SB4027. (A) Inactivation of  $fdmV$  by replacing an internal fragment with the  $aac(3)IV$  Am resistance gene as in pBS4059 and construction of the  $\Delta fdmV$  mutant strain SB4027 via a double crossover homologous recombination event. B, *Bgl*II; Bm, *Bam*HI; M, *Mlu*I; P, *Pst*I; S, *Sph*I. (B) Confirmation of the genotype of the  $\Delta fdmV$  mutant strain SB4027 by Southern analysis of genomic DNAs digested with *Mlu*I and *Bam*HI with the 0.8-kb *Bgl*II-*Sph*I fragment containing  $fdmU$  as a probe. Lane 1, *S. griseus* wild-type; lane 2, recombinant strain resulting from a single crossover event between the wild-type and pBS4059; lane 3, the desired  $\Delta fdmV$  mutant strain SB4027 as predicted from a double crossover event between the wild-type and pBS4059.

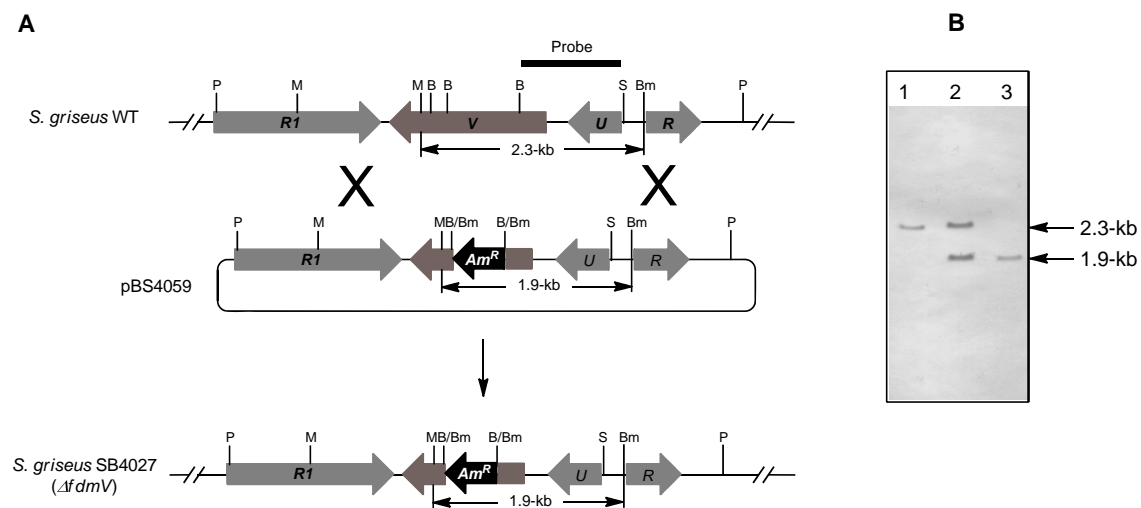

FIGURE S2. Amino acid sequence comparison of FdmV with selected homologs and AS B. The residues conserved in AS B active sites are marked with red asterisks. Accession numbers for each of the enzymes are: FdmV, AAQ08933; LlpA, CAM34350; PdmN, ABK58686; GrhP, AAM33677; RubR, AAM97368; OxyD, AAZ78328; TcsG, BAB12569; Ant-Orf1, ABW71832; PhzH, AAF17502; AS B, NP\_415200.

|          |       |                                                                                                           |
|----------|-------|-----------------------------------------------------------------------------------------------------------|
| FdmV     | (1)   | MCGVIGVVRQDGRFREDFPAVAEAMAGAMRQGPDECVRGGRTVITVTRNAVIDDLGSR--CPMAADSE---DFPMTIYCGEYVNAARSDIAGRGHGFATRS     |
| LlpA     | (1)   | MCGVIGVDFPERDLS-EHGSTVTRTAAATLARGPDEEAVWTGRCAALAFRRVAVIDPFGG--CPMVAEEDG---RQLAVLVNNGVYVWRTDDELAARGHGFATRS |
| PdmN     | (1)   | MSGFGVVDYERDIR-RSSATTRTNTATMRQGPDEEELWLSERLAFSHRRVAVLDFKGR--CPMRAEHDG---RELAVLAENGVYVWAGVRELAARGHGFATRS   |
| GrhP     | (1)   | MSAIGVVDPERDLS-FOALVETNAALARGPDRGVVAEGHAAALARRALLDITETGAQFAVHTTGG--AAVAVLIDGALNHTDARRLAARGHGFATRS         |
| RubR     | (1)   | MSAIGVVDPERDIT-FEAFVVAANAALARGPDRFEEIEGHAAALARRSLGSEHAG-QFATVESAG--SFVAVLIDGSLVNAVARRLAARGHGFATRS         |
| OxyD     | (1)   | MCGVIGVDFPERDLS-CPRLAWNTDTRARGPDRDLTGGHAAALGHRRLAVIIPAFHR--CPMSTLFD---GTSHTIETSGLVNFRVTELESQGHGFATRS      |
| TcsG     | (1)   | MCGVIGVDFPAE-HRRDLCAQIDYARGPDAEGLFGRALGLGHR-SVIEPEHR--CPMTAEHE---GRCALITSSGLNFRVRELTSHGHGFATRS            |
| Ant-Orf1 | (1)   | MCGVIGVDFADPDI-AERRVCAQVDMARGPDEEAVVRFVRFVGRHRSVIDLGG--CPAVTEITLFDGTFPAALSYSGVINGTDRRELAARGHGFATRS        |
| PhzH     | (1)   | MCGVIGVDFYTRIE-GDPALRMTNMLARGPDAEELKRRRLGHRRLAVIDLGGT--CPMVFYFADG---QEVSVITGTVVNDARDGCRQAQGHGFATRS        |
| AS B     | (1)   | MSVFCVFIKTIKAV-ELRKALELSRLRARGPDSVSEIYASDNIILRRSIVYVNAAR--RELYNQOK-----THVAVNGVYVWQAARVYEDC-VYQFSGSDC     |
|          |       | * * * * *                                                                                                 |
| FdmV     | (106) | EVLRYVYVGERCPFLGGAAADATRSFTRDRFGPVAEIGDGVFGSEPKALVSDVSEFDLGLAVFESMAAFEGCVYFSLDIEFALTRFPG                  |
| LlpA     | (105) | EVLRYVYVGERACVEHGGAAADDPRELLLRDRGPPVAARVGGVFGSVYALLAHLHEFYVDEGLAELLSYIATPGRALVYRRENRREHITIND              |
| PdmN     | (105) | EVLRYVYVGERCAALGGAAADDPSEELLLRDRGCPVAIYVDFGLTASEPKALLAHVNDATVINDRELLSQTPTPAVYKRMVNRRAHVTWRIE              |
| GrhP     | (107) | EVLRYVYVGERGDFITLGGAAADDPKQLLRDRGCPSEHVFPGVFGSEPKALLAHFDADVDADGLAEFAQRKPGTGFGRKREIVFSEHAIWR               |
| RubR     | (106) | EVLRYVYVGERCAFFELGGAAADDPKQLLRDRGCPGCVLIFPGVFGSEPKALLAHFAPRFDVADGLAEFASRKRPGTGFGRKREIVFSEHAIWR            |
| OxyD     | (105) | EVLRYVYVGERLVDRLGGAAADDPKQLLRDRGCPVAIYVDFGLTASEPKALLAHVNDATVINDRELLSQTPTPAVYKRMVNRRAHVTWRIE               |
| TcsG     | (104) | EVLRYVYVGERLVEHGGAAADDPSEELLLRDRGPPVAIYVDFGLTASEPKALLAHVNDATVINDRELLSQTPTPAVYKRMVNRRAHVTWRIE              |
| Ant-Orf1 | (108) | EVLRYVYVGEREFTVRLGGAAADDPKQLLRDRGCPVAIYVDFGLTASEPKALLAHVNDATVINDRELLSQTPTPAVYKRMVNRRAHVTWRIE              |
| PhzH     | (105) | EVLRYVYVGERCCDHLGGAAADDPKQLLRDRGCPVAIYVDFGLTASEPKALLAHVNDATVINDRELLSQTPTPAVYKRMVNRRAHVTWRIE               |
| AS B     | (101) | EVLRYVYVGERCCDHLGGAAADDPKQLLRDRGCPVAIYVDFGLTASEPKALLAHVNDATVINDRELLSQTPTPAVYKRMVNRRAHVTWRIE               |
|          |       | * * * * *                                                                                                 |
| FdmV     | (216) | DERSLRFVQIEEPEEELAGVATRELESSVAEFLVDPVSVLGGGDSLVAAARAAADGDSSEVETITVSYSEENQPIVYSAIDDFVRAVPE                 |
| LlpA     | (215) | GEVREKAVTIPREARDWDTVEVRELTESVSHVVDPEITLGGGDSGLAAARQDTFP---ATFAVDREHTTRERERWRHREDFPRAVTRF                  |
| PdmN     | (215) | RELVTEKAVEGREHTDDEATINRELEESISGRDPEVSLGGGDSGLAAARQDTFP---ATFAVDREHTTRERERWRHREDFPRAVTRF                   |
| GrhP     | (217) | PE-SRECRVSPREHTISDITVATRELDAAVASHTRDPEVGLMGGGDSGLAAARQDTFP---ATFAVDREHTTRERERWRHREDFPRAVTRF               |
| RubR     | (216) | PE-TGHRVSPREHTISDITVATRELDAAVASHTRDPEVGLMGGGDSGLAAARQDTFP---ATFAVDREHTTRERERWRHREDFPRAVTRF                |
| OxyD     | (215) | SE-WARRVSPREHTISDITVATRELDAAVASHTRDPEVGLMGGGDSGLAAARQDTFP---ATFAVDREHTTRERERWRHREDFPRAVTRF                |
| TcsG     | (214) | GEVREKAVTIPREARDWDTVEVRELTESVSHVVDPEITLGGGDSGLAAARQDTFP---ATFAVDREHTTRERERWRHREDFPRAVTRF                  |
| Ant-Orf1 | (218) | GH-RSEELVPEEHTDDVTRVRELELISQADPEITLGGGDSGLAAARQDTFP---ATFAVDREHTTRERERWRHREDFPRAVTRF                      |
| PhzH     | (215) | NQMKIQSFKVRRQCHRLQENQOTRELVTHALGSEHDPEVSLGGGDSGLAAARQDTFP---ATFAVDREHTTRERERWRHREDFPRAVTRF                |
| AS B     | (185) | DERSLRFVQIEEPEEELAGVATRELESSVAEFLVDPVSVLGGGDSLVAAARAAADGDSSEVETITVSYSEENQPIVYSAIDDFVRAVPE                 |
|          |       | * * * * *                                                                                                 |
| FdmV     | (325) | IEAEHLEITADITVARTVRCQVY-APFEMDSTIQALAGR-RERVALGSDLPFGSIVHIDLAHEEQEVAFEQNHETRRSEGGSESPNF                   |
| LlpA     | (319) | IEAEHLEITADITVARTVRCQVY-APFEMDSTIQALAGR-RERVALGSDLPFGSIVHIDLAHEEQEVAFEQNHETRRSEGGSESPNF                   |
| PdmN     | (323) | IEAEHLEITADITVARTVRCQVY-APFEMDSTIQALAGR-RERVALGSDLPFGSIVHIDLAHEEQEVAFEQNHETRRSEGGSESPNF                   |
| GrhP     | (326) | IEAEHLEITADITVARTVRCQVY-APFEMDSTIQALAGR-RERVALGSDLPFGSIVHIDLAHEEQEVAFEQNHETRRSEGGSESPNF                   |
| RubR     | (324) | IEAEHLEITADITVARTVRCQVY-APFEMDSTIQALAGR-RERVALGSDLPFGSIVHIDLAHEEQEVAFEQNHETRRSEGGSESPNF                   |
| OxyD     | (319) | IEAEHLEITADITVARTVRCQVY-APFEMDSTIQALAGR-RERVALGSDLPFGSIVHIDLAHEEQEVAFEQNHETRRSEGGSESPNF                   |
| TcsG     | (316) | IEAEHLEITADITVARTVRCQVY-APFEMDSTIQALAGR-RERVALGSDLPFGSIVHIDLAHEEQEVAFEQNHETRRSEGGSESPNF                   |
| Ant-Orf1 | (326) | IEAEHLEITADITVARTVRCQVY-APFEMDSTIQALAGR-RERVALGSDLPFGSIVHIDLAHEEQEVAFEQNHETRRSEGGSESPNF                   |
| PhzH     | (324) | IEAEHLEITADITVARTVRCQVY-APFEMDSTIQALAGR-RERVALGSDLPFGSIVHIDLAHEEQEVAFEQNHETRRSEGGSESPNF                   |
| AS B     | (291) | IEAEHLEITADITVARTVRCQVY-APFEMDSTIQALAGR-RERVALGSDLPFGSIVHIDLAHEEQEVAFEQNHETRRSEGGSESPNF                   |
|          |       | * * * * *                                                                                                 |
| FdmV     | (433) | DFIDMGSYVAEACAMSRILRPRGEEISRAEICDTHLHTRERENRDLVSSEVVRPDCDRLQVAYNIPNANKYFDGSEKSVLRARADLDFRVVDF             |
| LlpA     | (425) | EKVYDPPVYAGNADAVRETEVPEPERDALLRAGYEMRNLLTINHEEYVLEVRVYCDHRMEYVFNIPNRFARGEKSEPRANRGLPESVIRRS               |
| PdmN     | (430) | ESLIDIPVYRDSEHARLREHVEADPCRRKREITHTVTRVPELRNDREHAYVGLTTPCQPEELCAEENHIEGSEGRKSLRAAVADLLPEVYKRP             |
| GrhP     | (435) | KRLDPLDADQHRDAITVPHVVDATAASRAAEVYVATVRAAFELDRADRMSEHVFQLEPPCDRALVEYVYVFAARVRSVYKSLLSAAVADLLPEVYKRP        |
| RubR     | (433) | KEIDPMDYADQHRDAITVPHVVDATAASRAAEVYVATVRAAFELDRADRMSEHVFQLEPPCDRALVEYVYVFAARVRSVYKSLLSAAVADLLPEVYKRP       |
| OxyD     | (424) | KRLDPLDADQHRDAITVPHVVDATAASRAAEVYVATVRAAFELDRADRMSEHVFQLEPPCDRALVEYVYVFAARVRSVYKSLLSAAVADLLPEVYKRP        |
| TcsG     | (421) | KRLDPLDADQHRDAITVPHVVDATAASRAAEVYVATVRAAFELDRADRMSEHVFQLEPPCDRALVEYVYVFAARVRSVYKSLLSAAVADLLPEVYKRP        |
| Ant-Orf1 | (431) | AEIINPEYIADQHRDAITVPHVVDATAASRAAEVYVATVRAAFELDRADRMSEHVFQLEPPCDRALVEYVYVFAARVRSVYKSLLSAAVADLLPEVYKRP      |
| PhzH     | (424) | RQCDLQYQASDADAQCQEHRAQDPPHRRMRECMHKKMVMVLDKQRLSMANSEVVRPFDHEVYVYVFNVSISKSGEHWLWCKMCFVVEAVVRR              |
| AS B     | (377) | KRLDPLDADQHRDAITVPHVVDATAASRAAEVYVATVRAAFELDRADRMSEHVFQLEPPCDRALVEYVYVFAARVRSVYKSLLSAAVADLLPEVYKRP        |
|          |       | * * * * *                                                                                                 |
| FdmV     | (543) | XAPFVSDAAYTRAHQTEVLADEASEFLPILLLESAVARE-GGDLQDMIEKMNVMVLOVAWRELESDVEN--                                   |
| LlpA     | (525) | XSEFFVSDAAYTRAHQTEVLADEASEFLPILLLESAVARE-GGDLQDMIEKMNVMVLOVAWRELESDVEN--                                  |
| PdmN     | (530) | XSEFFVSDAAYTRAHQTEVLADEASEFLPILLLESAVARE-GGDLQDMIEKMNVMVLOVAWRELESDVEN--                                  |
| GrhP     | (535) | XSEFFVSDAAYTRAHQTEVLADEASEFLPILLLESAVARE-GGDLQDMIEKMNVMVLOVAWRELESDVEN--                                  |
| RubR     | (533) | XSEFFVSDAAYTRAHQTEVLADEASEFLPILLLESAVARE-GGDLQDMIEKMNVMVLOVAWRELESDVEN--                                  |
| OxyD     | (524) | XSEFFVSDAAYTRAHQTEVLADEASEFLPILLLESAVARE-GGDLQDMIEKMNVMVLOVAWRELESDVEN--                                  |
| TcsG     | (521) | XSEFFVSDAAYTRAHQTEVLADEASEFLPILLLESAVARE-GGDLQDMIEKMNVMVLOVAWRELESDVEN--                                  |
| Ant-Orf1 | (531) | XSEFFVSDAAYTRAHQTEVLADEASEFLPILLLESAVARE-GGDLQDMIEKMNVMVLOVAWRELESDVEN--                                  |
| PhzH     | (524) | XSEFFVSDAAYTRAHQTEVLADEASEFLPILLLESAVARE-GGDLQDMIEKMNVMVLOVAWRELESDVEN--                                  |
| AS B     | (482) | YNTPTREAYVYRETFEELPFPSEACVYGGVSNACSSKAEIWDARFKMDDPFGRAVGMHQSAVK-----                                      |

FIGURE S3. Optimization of FdmV assay conditions with varying (A) pH (100 mM Tris-HCl) and (B) DMSO concentration.

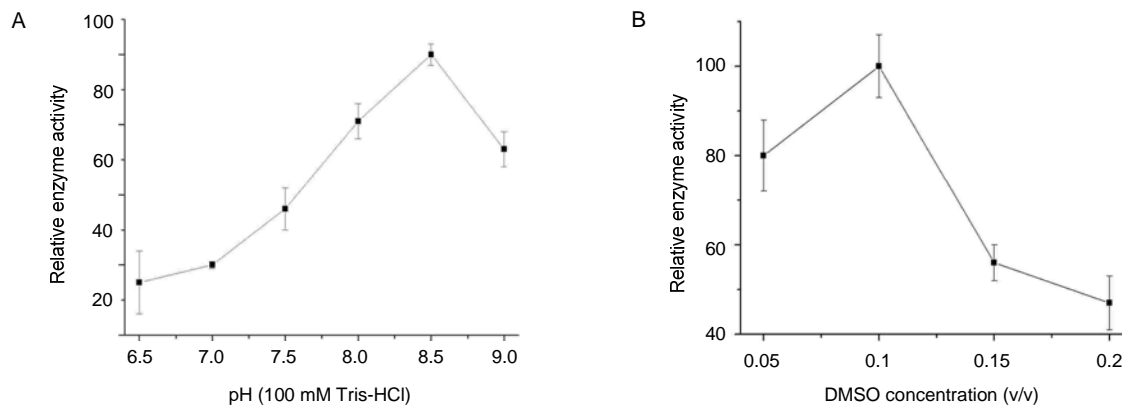

FIGURE S4. Structures of benzoic acids tested as substrate analogs for FdmV-catalyzed amidation.

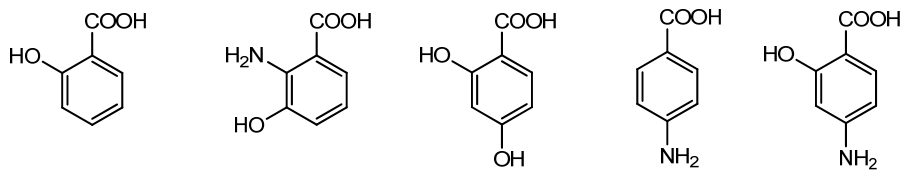

FIGURE S5. FdmV-catalyzed amidation of FDM M-3 to FDM M-6 as analyzed by HPLC: (I) completed assay with boiled FdmV as a control and (II) completed assay with FdmV under the optimized assay condition with L-Gln as an ammonia source for 3 hrs. (●) FDM M-3; (◆) FDM M-6.

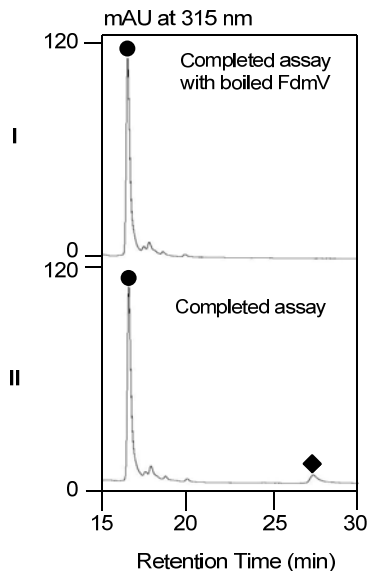

Supplement: supp_M110.147744_jbc.M110.147744-1.pdf [file supp_M110.147744_jbc.M110.147744-1.pdf]
